# Supplementary material for: Review of guidance papers on regression modeling in statistical series of medical journals
Source: PubMed Central journal article supplement (PMC8786189; doi:10.1371/journal.pone.0262918), 2022-01-24
Supplement: pone.0262918.s002.pdf [file pone.0262918.s002.pdf]

## List of candidate series for potential inclusion in the review

Selected series are shaded grey.

| ID | Journal                                 | Title of the series                                                                                | Reason for exclusion               |
|----|-----------------------------------------|----------------------------------------------------------------------------------------------------|------------------------------------|
| 1  | Advances in Physiology Education        | Explorations in statistics column                                                                  |                                    |
| 2  | American Journal of Epidemiology        | Practice of Epidemiology Issue Section                                                             | too advanced                       |
| 3  | Annals of Allergy, Asthma & Immunology  | The reading, writing, and arithmetic of the medical literature                                     | less than 5 coherent articles      |
| 4  | Archives of Disease in Childhood        | Statistics from the inside series                                                                  |                                    |
| 5  | Circulation                             | Statistical Primer for Cardiovascular Research                                                     |                                    |
| 6  | Clinical Radiology                      | A guide to clinical epidemiology for radiologists: Part I and II                                   | less than 5 coherent articles      |
| 7  | Columbia University                     | Population Health Methods                                                                          | not published in a medical journal |
| 8  | Deutsche Medizinische Wochenzeitschrift | Statistik-Serie in der DMW                                                                         | not published in English           |
| 9  | Deutsche Zahnärztliche Zeitschrift      | EbM-Splitter                                                                                       | not published in English           |
| 10 | Deutsches Ärzteblatt                    | Serie zur Bewertung wissenschaftlicher Publikationen                                               | not published in English           |
| 11 | Deutsches Ärzteblatt International*     | Series on Evaluation of Scientific Publications                                                    |                                    |
| 12 | Emergency Medicine Journal              | An introduction to statistics                                                                      | no topic-relevant article          |
| 13 | European Heart Journal                  | Statistical Tutorials                                                                              |                                    |
| 14 | JAMA                                    | Guide to Statistics and Methods                                                                    |                                    |
| 15 | JAMA                                    | Users' Guide to the Medical Literature                                                             | no topic-relevant article          |
| 16 | Journal of Clinical Oncology            | Statistics in Oncology Series                                                                      | too advanced                       |
| 17 | Journal of Medical Systems              | Methodological and Statistical Techniques: What Do Residents Really Need to Know About Statistics? | less than 5 coherent articles      |

|    |                                                 |                                                                         |                               |
|----|-------------------------------------------------|-------------------------------------------------------------------------|-------------------------------|
| 18 | Journal of the American College of Surgeons     | Interpreting statistics in medical literature: A vademecum for surgeons | less than 5 coherent articles |
| 19 | Journal of Thoracic Disease                     | Statistics Corner Column                                                |                               |
| 20 | Kidney International                            | ABC of Epidemiology                                                     |                               |
| 21 | Malawi Medical Journal                          | Statistics Corner                                                       | less than 5 coherent articles |
| 22 | Medizinische Monatszeitschrift für Pharmazeuten | Fortbildung Wissensbasierung                                            | not published in English      |
| 23 | Nederlands Tijdschrift van Geneeskunde          |                                                                         | not published in English      |
| 24 | Nephrology Dialysis Transplantation             | Clinical research in Kidney Diseases                                    |                               |
| 25 | Nephrology Dialysis Transplantation             | Clinical Epidemiology in Nephrology                                     |                               |
| 26 | Nephron Clinical Practice                       | Kidney Disease and population health                                    |                               |
| 27 | Postgraduate Medical Journal                    | Development of the Biostatistics and Clinical Epidemiology Skills       | less than 5 coherent articles |
| 28 | RadioGraphics                                   | Statistics 101 for radiologists                                         | less than 5 coherent articles |
| 29 | Radiology                                       | Statistical Concepts Series                                             |                               |
| 30 | Statistics in Medicine                          | Tutorials in Biostatistics Series                                       | too advanced                  |
| 31 | The Annals of Thoracic Surgery                  | The statistician's page                                                 |                               |
| 32 | The BMJ                                         | Statistics Notes                                                        |                               |
| 33 | The European Journal of Cardio-Thoracic Surgery | Statistics Primers                                                      |                               |
| 34 | The Medical Journal of Australia                | Accessible series on statistics for clinicians                          |                               |
| 35 | American Journal of Roentgenology               | Fundamentals of Clinical Research for Radiologist                       |                               |
| 36 | American Journal of Ophthalmology               | Series on Statistics                                                    |                               |
| 37 | Annals of Internal Medicine                     | Research and Reporting Methods                                          | too advanced                  |
| 38 | Circulation                                     | Primer on Statistical Interpretation or Methods                         | less than 5 coherent articles |
| 39 | Critical Care                                   | Statistical review                                                      |                               |
| 40 | International Journal of Epidemiology           | Education Corner                                                        | too advanced                  |

|    |                                                    |                                         |                               |
|----|----------------------------------------------------|-----------------------------------------|-------------------------------|
| 41 | Journal of Clinical Psychopharmacology             | Statistics Commentary Series            |                               |
| 42 | Nature Methods                                     | Points of Significance                  |                               |
| 43 | Nutrition                                          | Random Bytes                            |                               |
| 44 | Psychosomatic Medicine                             | Statistical Corner                      | less than 5 coherent articles |
| 45 | Revista Española de Cardiología                    | Contemporary Methods in Biostatistics   |                               |
| 46 | Seminars in Hematology                             | Interpretation of Quantitative Research | less than 5 coherent articles |
| 47 | The Journal of Thoracic and Cardiovascular Surgery | Statistics for the Rest of Us           | no topic-relevant article     |

\*Articles of *Deutsches Ärzteblatt International* were originally written in German and published in *Deutsches Ärzteblatt*. These articles are later translated to English for *Deutsches Ärzteblatt International*.
