# Supplementary material for: Review of guidance papers on regression modeling in statistical series of medical journals
Source: PubMed Central journal article supplement (PMC8786189; doi:10.1371/journal.pone.0262918), 2022-01-24
Supplement: pone.0262918.s003.pdf [file pone.0262918.s003.pdf]

**Regression Modeling in Medical Statistics**  
**Review of Statistical Series**

**Case Report Form - Series inclusion**

|                       |  |
|-----------------------|--|
| <b>Name of rater</b>  |  |
| <b>Date of rating</b> |  |

|                                                    |  |
|----------------------------------------------------|--|
| <b>Journal</b>                                     |  |
| <b>Journal impact factor (Scopus, 2018)</b>        |  |
| <b>Statistical series name (if applicable)</b>     |  |
| <b>Overall number of articles (until 1.1.2019)</b> |  |

| <b>Inclusion criteria (series)</b>                         | Y                        | N                        |
|------------------------------------------------------------|--------------------------|--------------------------|
| 1. Published in a medical journal                          | <input type="checkbox"/> | <input type="checkbox"/> |
| 2. Statistical series with 5 or more coherent articles     | <input type="checkbox"/> | <input type="checkbox"/> |
| 3. Written in English                                      | <input type="checkbox"/> | <input type="checkbox"/> |
| 4. Target audience with limited background in statistics   | <input type="checkbox"/> | <input type="checkbox"/> |
| 5. The series contains at least one topic-relevant article | <input type="checkbox"/> | <input type="checkbox"/> |
| <b>Are <u>all</u> inclusion criteria met?</b>              | <input type="checkbox"/> | <input type="checkbox"/> |

We consider an article as topic-relevant, if:

- a) Its title contains one of the key words “regression”, “linear”, “logistic“, “Cox”, “survival”, “Poisson”, “multivariable” or “multivariate” or
- b) It is fairly plausible from the title that the article deals with regression modeling even if the title does not contain one of the above keywords.

**Identified topic-relevant articles** (sort according to year of publication, start with oldest article)

| No | Rank | Title | First author                 | Year of publication |
|----|------|-------|------------------------------|---------------------|
| 1  |      |       | <i>First name, Last name</i> |                     |
| 2  |      |       |                              |                     |
| 3  |      |       |                              |                     |
| 4  |      |       |                              |                     |
| 5  |      |       |                              |                     |
| 6  |      |       |                              |                     |
| 7  |      |       |                              |                     |
| 8  |      |       |                              |                     |

*Comments*

|                                                                                       |
|---------------------------------------------------------------------------------------|
| <i>E.g. None or Does not qualify because it is a single article and not a series.</i> |
|---------------------------------------------------------------------------------------|
